# Supplementary material
Source: PubMed Central journal article supplement (PMC2805019)
Supplement: NIHMS75340-supplement-Supplement.pdf [file NIHMS75340-supplement-Supplement.pdf]

**Supporting Information for:**

**A General Method for Discovering Inhibitors of  
Protein-DNA Interactions Using Photonic  
Crystal Biosensors**

*Leo L. Chan<sup>1</sup>, Maria Pineda<sup>2</sup>, James T. Heeres<sup>3</sup>, Paul J. Hergenrother<sup>3,4\*</sup>, Brian T.  
Cunningham<sup>1\*</sup>*

<sup>1</sup>Department of Electrical and Computer Engineering

<sup>2</sup>Department of Bioengineering

<sup>3</sup>Department of Biochemistry

<sup>4</sup>Department of Chemistry

University of Illinois at Urbana-Champaign

Urbana, IL 61801

\*Authors to whom correspondence should be addressed: [bcunning@uiuc.edu](mailto:bcunning@uiuc.edu),  
[hergenro@uiuc.edu](mailto:hergenro@uiuc.edu)

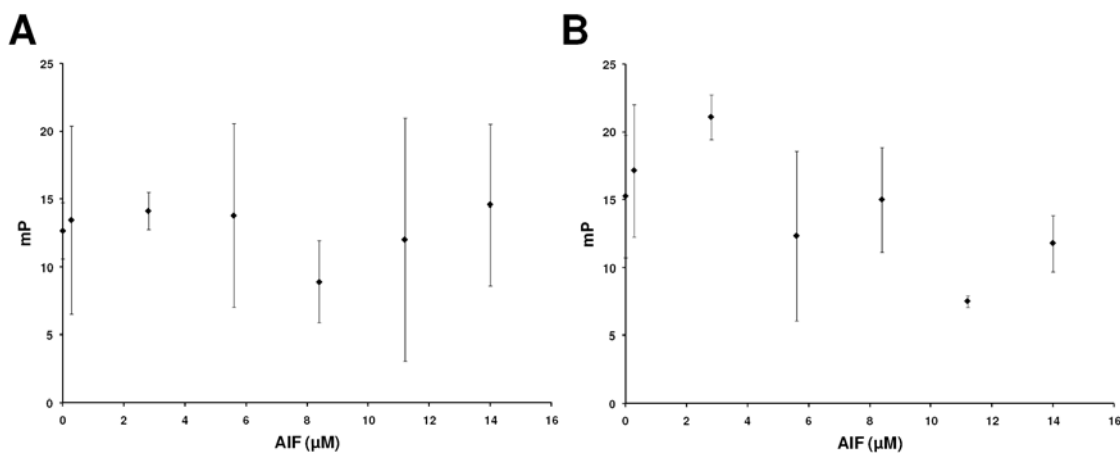

**Supporting Figure 1:** Fluorescence polarization experiments involving AIF and fluorescently labeled dsDNA oligomers. A) AIF was incubated with 100 nM Texas Red labeled 30mer for 30 min at 25°C. B) AIF was incubated with 100 nM Fluorescein labeled 20mer for 30 min at 25°C. Data was obtained using an Analyst HT fluorescent reader (Molecular Devices). Oligos: 5'-Texas Red-GTACCAGTCGGACGGATCGGACCAGTCGGA-3' complement: 5'-TCCGACTGGTCCGATCCGTCCGACTGGTAC-3', 5'-Fluorescein-TGTTTCGAGCTAGCTTACCAGT complement: 5'-ACTGGTAAGCTAGCTGAAC-3'. All experiments performed in 50 mM Tris, 100 mM NaCl, pH 8.0.

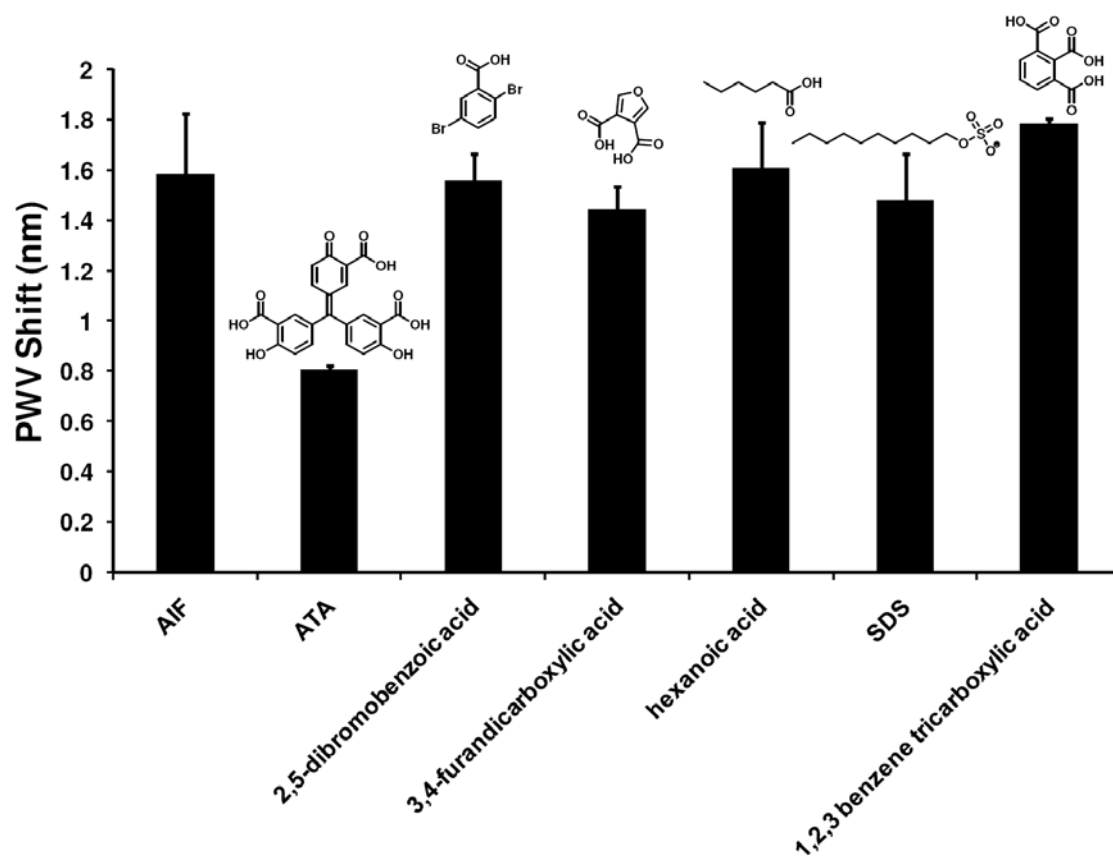

**Supporting Figure 2:** Other carboxylic acid containing or negatively charged compounds do not inhibit AIF. All compounds were incubated with AIF (7.01  $\mu$ M) at a concentration of 25  $\mu$ M. Assays were performed in accordance with previous AIF-DNA binding assays as described in the Methods section.
